# Supplementary material for: Use of the ADAPTE Method to Develop a Guideline for the Improvement of Depression Care in Primary Care
Source: Atypon-hosted journal article supplement (doi:10.1176/appi.ps.201700163), 2017-07-03
Supplement: appi.ps.201700163.ds001.pdf [file appi.ps.201700163.ds001.pdf]

**SUPPLEMENTAL MATERIAL****Table 1: CHARACTERISTICS OF PHYSICIANS (N=66) WHO COMPLETED THE SURVEY ABOUT AREAS OF CLINICAL AREAS (STAGE 1)**

|                                   | n  | %    |
|-----------------------------------|----|------|
| Sex                               |    |      |
| Male                              | 41 | 62,1 |
| Age                               |    |      |
| 26 - 34                           | 7  | 10,6 |
| 35 - 43                           | 9  | 13,6 |
| 44 - 52                           | 18 | 27,3 |
| 53+                               | 30 | 45,5 |
| Years of practice                 |    |      |
| 3 - 10                            | 9  | 13,6 |
| 11 - 18                           | 11 | 16,7 |
| 19 - 26                           | 18 | 27,3 |
| 27+                               | 27 | 40,9 |
| Prior training in depression care |    |      |
| No                                | 19 | 28,8 |
| Yes                               | 47 | 71,2 |

**Table 2: CLINICAL SCENARIOS**

**Feedback from doctors' survey about areas of uncertainty**

|                                                                                                        | Average (IC 95%)    |      |      | Average (IC 95%)     |      |      | p    |
|--------------------------------------------------------------------------------------------------------|---------------------|------|------|----------------------|------|------|------|
|                                                                                                        | Inf                 | Sup  |      | Inf                  | Sup  |      |      |
| <b>ADVANCED TRAINING ON DEPRESSION</b>                                                                 | <b>W/o training</b> |      |      | <b>With training</b> |      |      |      |
| How is depression defined?                                                                             | 4,21                | 3,80 | 4,62 | 4,17                 | 3,95 | 4,39 | ,711 |
| What is the frequency of depression?                                                                   | 3,84                | 3,55 | 4,13 | 3,80                 | 3,56 | 4,04 | ,922 |
| Have I to carry out screening for depression in Primary Care?                                          | 3,74                | 3,35 | 4,13 | 3,87                 | 3,63 | 4,11 | ,422 |
| Who has the highest risk of suffering depression?                                                      | 3,79                | 3,49 | 4,09 | 4,11                 | 3,94 | 4,28 | ,052 |
| How to screen for depression?                                                                          | 4,11                | 3,75 | 4,46 | 4,04                 | 3,80 | 4,29 | ,876 |
| How to diagnose depression?                                                                            | 4,53                | 4,23 | 4,82 | 4,60                 | 4,45 | 4,74 | ,779 |
| How to evaluate the severity of depression?                                                            | 4,42                | 4,13 | 4,71 | 4,63                 | 4,47 | 4,79 | ,173 |
| Which other causes of depression must be taken into account for differential diagnosis?                | 4,11                | 3,79 | 4,42 | 4,20                 | 4,01 | 4,38 | ,611 |
| Which is the prognosis?                                                                                | 3,95                | 3,65 | 4,25 | 4,04                 | 3,84 | 4,25 | ,517 |
| Which are the most frequent complications?                                                             | 4,00                | 3,64 | 4,36 | 4,19                 | 4,03 | 4,35 | ,300 |
| What is understood as recovery?                                                                        | 4,21                | 3,91 | 4,51 | 4,09                 | 3,89 | 4,28 | ,482 |
| Which factors predict recovery?                                                                        | 4,16                | 3,83 | 4,49 | 4,15                 | 3,96 | 4,34 | ,948 |
| How much disabling depression is?                                                                      | 3,84                | 3,47 | 4,21 | 4,00                 | 3,79 | 4,21 | ,306 |
| What is the stepped-care model for depression?                                                         | 4,37                | 4,08 | 4,66 | 4,60                 | 4,43 | 4,77 | ,123 |
| How do I confirm the diagnosis?                                                                        | 4,32                | 3,99 | 4,64 | 4,26                 | 4,06 | 4,46 | ,775 |
| Which patients with depression should I refer to mental health care?                                   | 4,47                | 4,14 | 4,81 | 4,53                 | 4,35 | 4,71 | ,813 |
| Which is the therapeutic objective for depression treatment?                                           | 4,39                | 4,09 | 4,69 | 4,39                 | 4,22 | 4,56 | ,987 |
| How to treat a mild depressive episode?                                                                | 4,21                | 3,87 | 4,55 | 4,49                 | 4,32 | 4,66 | ,137 |
| How to treat moderate and severe depression?                                                           | 4,16                | 3,83 | 4,49 | 4,49                 | 4,33 | 4,65 | ,067 |
| How to treat depression linked to other psychological disorders?                                       | 4,11                | 3,79 | 4,42 | 4,15                 | 3,93 | 4,37 | ,657 |
| How to manage grief?                                                                                   | 4,21                | 3,83 | 4,59 | 4,49                 | 4,31 | 4,67 | ,183 |
| Which psychological treatments are recommended for the different levels of depression severity?        | 4,21                | 3,87 | 4,55 | 4,28                 | 4,09 | 4,47 | ,754 |
| Which antidepressant should I use as first choice?                                                     | 4,53                | 4,23 | 4,82 | 4,66                 | 4,51 | 4,81 | ,404 |
| What should I have into account before selecting antidepressant?                                       | 4,47                | 4,14 | 4,81 | 4,64                 | 4,50 | 4,78 | ,467 |
| When must I follow-up a patient with depression whom I prescribed antidepressant medication?           | 4,16                | 3,87 | 4,45 | 4,26                 | 4,10 | 4,41 | ,559 |
| How long should antidepressant treatment last?                                                         | 4,26                | 3,91 | 4,62 | 4,45                 | 4,29 | 4,61 | ,399 |
| What to do if there is not response to the treatment or it is insufficient?                            | 4,37                | 4,04 | 4,70 | 4,57                 | 4,43 | 4,72 | ,291 |
| Which antidepressants must I use as a second choice?                                                   | 4,37                | 4,04 | 4,70 | 4,41                 | 4,25 | 4,57 | ,948 |
| What is the effectiveness of self-help interventions and support groups?                               | 3,89                | 3,58 | 4,21 | 4,09                 | 3,89 | 4,28 | ,228 |
| What to recommend if the patient requires therapy with medicinal plants?                               | 3,58                | 3,14 | 4,01 | 3,43                 | 3,14 | 3,71 | ,566 |
| Which advices should be given when prescribing antidepressants?                                        | 4,00                | 3,68 | 4,32 | 4,30                 | 4,14 | 4,46 | ,086 |
| Which dosage of antidepressants should be used?                                                        | 4,37                | 4,04 | 4,70 | 4,57                 | 4,42 | 4,73 | ,267 |
| How to increase the dose?                                                                              | 4,32                | 3,99 | 4,64 | 4,55                 | 4,39 | 4,71 | ,182 |
| What do I have to monitor in a patient who takes antidepressants?                                      | 4,11                | 3,75 | 4,46 | 4,36                 | 4,17 | 4,55 | ,188 |
| How to interrupt treatment with antidepressants?                                                       | 4,21                | 3,91 | 4,51 | 4,53                 | 4,37 | 4,69 | ,054 |
| How to switch from an antidepressant to another one?                                                   | 4,42                | 4,09 | 4,75 | 4,64                 | 4,50 | 4,78 | ,267 |
| How to manage antidepressants in special conditions? (Pregnancy and lactation. Postpartum depression). | 4,26                | 3,95 | 4,58 | 4,60                 | 4,44 | 4,75 | ,047 |
| Do antidepressants increase the risk of suicide?                                                       | 4,16                | 3,76 | 4,56 | 4,32                 | 4,11 | 4,53 | ,474 |
| How to treat depression in older people?                                                               | 4,16                | 3,79 | 4,53 | 4,64                 | 4,48 | 4,79 | ,012 |
| Which are the most frequent adverse effects with antidepressants?                                      | 4,26                | 3,91 | 4,62 | 4,47                 | 4,28 | 4,66 | ,267 |

**Table 3: AGREE SCORING OF THE EVALUATED CGs**

|                                                 | ITEM                                                                                                             | ICS* | BAP | NICE | NZGG | ACP |
|-------------------------------------------------|------------------------------------------------------------------------------------------------------------------|------|-----|------|------|-----|
|                                                 | The general objective(s) of the guide is (are) specifically described.                                           | 4    | 4   | 4    | 4    | 4   |
|                                                 | The clinical aspect(s) covered by the guide is (are) specifically described.                                     | 4    | 4   | 4    | 4    | 4   |
| Scope                                           | Patient to whom the guide is expected to be applied are specifically described.                                  | 4    | 4   | 4    | 4    | 3   |
| Involvement                                     | Team developing the guide includes individuals from relevant professional groups.                                | 4    | 2   | 4    | 4    | 1   |
|                                                 | Patient points of view regarding his preferences have been taken into account.                                   | 1    | 1   | 4    | 3    | 1   |
|                                                 | Target users of the guide are clearly defined.                                                                   | 4    | 3   | 4    | 4    | 3   |
|                                                 | The guide has been tested among target users.                                                                    | 1    | 1   | 4    | 2    | 1   |
| Accuracy                                        | Systematic methods for searching of evidence have been used.                                                     | 4    | 3   | 4    | 4    | 4   |
|                                                 | Criteria to choose evidence are clearly described.                                                               | 2    | 4   | 4    | 4    | 4   |
|                                                 | The methods used to formulate recommendations are clearly described.                                             | 4    | 4   | 4    | 4    | 3   |
|                                                 |                                                                                                                  | 3    | 2   | 4    | 4    | 4   |
|                                                 | When formulating recommendations, health benefits, as well as secondary effects and risks, have been considered. | 4    | 2   | 4    | 4    | 3   |
|                                                 | There is an explicit relation between each one of the recommendations and the evidences on which are based.      |      |     |      |      |     |
|                                                 | The guide has been reviewed by external experts before being published.                                          | 2    | 3   | 4    | 4    | 4   |
| It is included a procedure to update the guide. | 4                                                                                                                | 1    | 4   | 3    | 4    |     |
| Clarity                                         | Recommendations are specific, not being ambiguous                                                                | 4    | 3   | 4    | 4    | 4   |
|                                                 | Different options for the handling of illness or condition are presented clearly.                                | 4    | 4   | 4    | 4    | 2   |
|                                                 | Key recommendations are easily identifiable.                                                                     | 4    | 4   | 4    | 4    | 4   |
|                                                 | The guide is supported by tools for its application.                                                             | 2    | 1   | 4    | 3    | 1   |
| Applicability                                   | Potential organizational barriers at the time of applying recommendations have been discussed.                   | 2    | 1   | 4    | 2    | 1   |
|                                                 | Potential costs arising from application of the recommendations have been taken into account.                    | 2    | 1   | 4    | 1    | 1   |
|                                                 | The guide offers a series of key criteria aimed to perform monitoring and/or audit.                              | 4    | 1   | 4    | 1    | 1   |
| Neutrality                                      | The guide, publishing speaking, is independent from the financing entity.                                        | 1    | 1   | 1    | 4    | 4   |
|                                                 | The conflicts of interests among the members of the development group have been appropriately registered.        | 4    | 1   | 4    | 4    | 4   |

ICS: Institute for Clinical Improvement, BAP: British Association of Psychopharmacology, NICE: National Institute for Clinical Excellence, NZGG: New Zealand Guideline Group, ACP: American College Physicians.

**Table 4: EXAMPLES OF ADAPTED RECOMMENDATIONS**

| ORIGINAL RECOMMENDATIONS                                                                                                                                                                          | ADAPTED RECOMMENDATIONS                                                                                                                                                                                                                                                                                                                                                                                                      |
|---------------------------------------------------------------------------------------------------------------------------------------------------------------------------------------------------|------------------------------------------------------------------------------------------------------------------------------------------------------------------------------------------------------------------------------------------------------------------------------------------------------------------------------------------------------------------------------------------------------------------------------|
| <p>For patients with initial presentation of severe depression and a chronic physical health problem, consider offering a combination of individual CBT and an antidepressant.</p>                | <p>For patients with initial presentation of severe depression and a chronic physical health problem, consider offering a combination of individual CBT and an antidepressant.</p> <p><i>Note: Depending on the characteristics of health care, it is possible that the accessibility to psychological therapy resources is variable but it is an intervention that must be performed as soon as there is available.</i></p> |
| <p>Do not switch to, or start, dosulepin because evidence supporting its tolerability relative to other antidepressants is outweighed by the increased cardiac risk and toxicity in overdose.</p> | <p>Do not switch to, or start, dosulepin because evidence supporting its tolerability relative to other antidepressants is outweighed by the increased cardiac risk and toxicity in overdose. <i>(Alert: The use of this drug is minimal in the area of Primary Care in Spain).</i></p>                                                                                                                                      |

**Table 5: BARRIERS AND FACILITATORS**

**BARRIERS**

**a) Clinicians factors:**

- Lack of mental health training
- Low interest on matters related to mental health
- Low adherence to guidelines and treatment protocol
- Saturation with excessive information
- Variability of clinical practice

**b) System Factors**

- Recommendations not tackling frequent daily problems, such as organization of depression care, lack of adherence to treatment, over diagnosis.
- Inadequate length of visits
- Risk of insufficient dissemination,
- Lack of endorsement from scientific societies
- Low cooperation between Primary Care and Mental Health teams

**c) Patients:**

- Physical co-morbidity of patients with depression at Primary Care

**FACILITATORS**

**a) Clinicians:**

- Quality of methods used to develop the CG and the supplementary resources.
- The information and recommendations is up-to date.
- Recommendations contextualized in the Spanish Health Care System

**b) System Factors**

- Lack of conflict of interests (such as lack of support from drug companies)
- CG orientated to primary care practice.
- Endorsement of public institutions, scientific societies at a national and regional, level
- Make the guide be part of computerized clinical report

**c) Patients:**

- The increasing demand of depression care for PCPs.
